# Supplementary material
Source: Research Square preprint supplement (doi:10.21203/rs.3.rs-9188828/v1)
Supplement: Supplementary file 1 [file c86231cad1c7eac743793401.docx]

**Appendix**

The significant MLR equations wet *(1)*, intermediate *(2)*, and dry *(3)*

*T mean = 2.2890 + 0.4293 T max+ 0.4794 T min -0.2000 RA +0.0866 PH+ 0.0022 WG+ 0.0004 WD (1)*

*T mean = 3.3967 + 0.3177 T max+ 0.2351 T min-0.3156 RA + 0.2490 AT mean +0.0131 PH + 0.0133 WG (2)*

*T mean = 0.7103 + 0.4764T max+ 0.4886 T min -0.2192 RA+0.0171 PH -0.0018 WG + 0.0670 WD (3)*

The significant ARIMAF equations are wet *(4)*, intermediate *(5)*, and dry *(6)*

*Δyt = (-0.0009) Δyt−1 + 0.3444Δyt−2 − 0.0085Δyt−3 + 0.0357Δyt−4 + 0.0702Δyt−5 + 0.7388 sin (2π t / 365)*

*− 0.2726 cos (2π t / 365) + 0.1187 sin (4π t / 365) − 0.3222 cos (4π t / 365)*

*+ 0.0055 sin (6π t / 365) − 0.1144 cos (6π t / 365) − 0.3447 εt−1 − 0.5955 εt−2 + εt. (4)*

*Δyt = 0.7963 Δyt−1+ 0.8942 sin (2π t / 365) − 0.4033 cos (2π t / 365) + 0.0775 sin (4π t / 365)*

*− 0.6122 cos (4π t / 365) − 0.1849 sin (6π t / 365) − 0.1540 cos (6π t / 365) − 0.1185 sin (8π t / 365)*

*+ 0.0608 cos (8π t / 365) − 0.0610 sin (10πt / 365) + 0.0528 cos (10π t / 365) + 0.0606 sin (12π t / 365)*

*− 0.0606 cos (12π t / 365) − 1.1155 εt−1 + 0.0059 εt−2 + 0.0817 εt−3 + 0.0442 εt−4 + εt. (5)*

*Δyt = 1.5075 Δyt−1 − 0.9974 Δyt−2 + 0.3265 Δyt−3 + 0.6091 sin (2π t / 365) − 0.8540 cos (2π t / 365)*

*− 0.0702 sin (4π t / 365) − 0.5490 cos (4π t / 365) − 0.1337 sin (6π t / 365) − 0.0993 cos (6π t / 365)*

*− 0.0907 sin (8π t / 365) + 0.0685 cos (8π t / 365) − 0.0790 sin (10π t / 365) + 0.0601 cos (10π t / 365)*

*− 1.7943 εt−1 + 1.1723 εt−2 − 0.3610 εt−3+ εt. (6)*

The significant polynomial regression equations for wet *(7)*, intermediate *(8),* and dry *(9)*

*T mean = 26.700 + 23.1415 T max + 4.1168 T max² + 20.2101 T min - 1.8433 T min² - 14.1884 AT max - 3.3692 AT max²*

*- 15.0346 AT min + 3.0510 AT min² + 40.5160 AT mean - 2.0757 AT mean² - 23.5444 SW - 6.9647 RA*

*+ 0.5234 RA² + 3.0293 PH - 0.6236 PH² + 3.2757 WS + 0.8262 WS² + 2.5307 WG + 0.5126 WG²*

*+ 34.5597 ET (7)*

*T mean = 25.7902+24.0993 T max + 5.7357 T max² + 0.8736 T max³ - 1.4959 T max4 - 0.3961 T max5+ 16.4982 T min*

*- 1.6003 T min³ - 0.4101 T min4 - 18.2424 AT max- 3.9211 AT max²- 0.9762 AT max³ + 1.9334 AT max4*

*- 0.4824 AT max5- 12.6259 AT min + 56.4213 AT mean - 0.7874 AT mean³ - 1.7253 AT mean4- 22.5724 SW*

*+ 2.2722 SW² + 2.8848 SW³ + 0.9251 SW4 - 6.5854 RA + 0.7848 RA³ + 1.1657 PH - 0.7636 PH³*

*+ 0.5112 PH4 + 7.4693 WS - 0.9570 WS² - 0.4196 WS³ + 0.3809 WS4+ 1.9831 WG + 1.2281 WG²*

*- 0.8013 WG³ - 0.6208 WD - 0.4424 WD² + 0.4770 WD³ + 0.3089 WD 4 + 0.3253 WD 5+ 37.3935 ET*

*- 3.5687 ET² - 3.0581 ET³ (8)*

T mean = 27.0917+ 11.3674 T max + 2.7578 T max² + 0.8638 T max³ + 0.3474 T max5+ 19.0351 T min + 0.8526 T min²

- 1.9512 T min³ + 0.5174 T min5- 10.9709 AT max - 3.2294A T max² + 0.3180 AT max4 - 0.3268 AT max 5

- 14.8587 AT min + 1.0754 AT min³+ 58.9451 AT mean + 1.3092 AT mean² + 0.4581 AT mean³ - 0.6795 AT mean4 + 0.5131 AT mean5- 30.2676 SW + 1.7903 SW² + 1.2282 SW4- 3.5902 RA - 0.9847 RA² + 0.9347 RA³

+ 0.4118 RA4+ 0.7756 PH² - 0.7065 PH³+ 6.1331 WS + 0.4081 WS³+ 2.6644 WG - 0.6296 WD

- 0.6483 WD² + 0.5310 WD5+ 44.4308 ET - 1.9074 ET² + 1.1242 ET³ + 0.7721 ET4 + 0.4529 ET5 *(9)*
